# Supplementary material for: Clinical Value of Inflammatory and Neurotrophic Biomarkers in Bipolar Disorder: A Systematic Review and Meta-Analysis
Source: MDPI journal article supplement (doi:10.3390/biomedicines10061368), 2022-06-09
Supplement: s1 [file s1]

**Table S1.** Supplementary information on the 51 studies included in the present systematic review and meta-analysis.

| ID | First author-year       | Complete sample                                                                                                        | Mean age (range)                                                                                                                             | Sex (M/F)                                                                                                                                                    | Study design              | Diagnosis                      | Assay          | Blood fraction | Medication               | Use/abuse substances | Financing |
|----|-------------------------|------------------------------------------------------------------------------------------------------------------------|----------------------------------------------------------------------------------------------------------------------------------------------|--------------------------------------------------------------------------------------------------------------------------------------------------------------|---------------------------|--------------------------------|----------------|----------------|--------------------------|----------------------|-----------|
| 1. | Bai et al. (2014)       | 130 BD patients (77 BD-I, 53 BD-II) (75 euthymic, 14 (hypo)manic state, 41 depressive state)<br>130 Healthy controls   | 44.55±11.08 BD (47.0±11.7 BD-I, 41.0±10.2 BD-II) (44.9±12.4 euthymic, 46.1±9.3 (hypo)manic state, 43.4±10.2 depressive state)<br>41.8±9.7 HC | 31.55%/68.44% BD (33.8%/66.2% BD-I, 28.3%/71.7% BD-II) (33.3%/66.7% euthymic, 21.4%/78.6% (hypo)manic state, 33.3%/66.7% depressive state)<br>35.4%/64.6% HC | Cross-sectional study     | MINI DSM-IV diagnosis criteria | ELISA          | Serum          | Drug-naïve and medicated | Excluded             | Yes       |
| 2. | Barbosa et al. (2010)   | 53 BD-I patients (34 mania, 19 euthymia)<br>38 Healthy controls                                                        | 47.77±13.01 BD-I (49.6±14.2 mania, 44.5±10.9 euthymia)<br>42.9±9.7 HC                                                                        | 39.59%/60.40% BD-I (38.2%/61.8% mania, 42.1%/57.9% euthymia)<br>47.4%/52.6% HC                                                                               | Cross-sectional study     | MINI-plus                      | ELISA          | Plasma         | Yes                      | Included             | Yes       |
| 3. | Barbosa et al. (2011)   | 49 BD-I patients (30 manic, 19 euthymic)<br>26 Healthy controls                                                        | 46.85±12.56 BD-I (48.03±13.66 manic, 45.00±10.84 euthymic)<br>42.94±9.39 HC                                                                  | 40.81%/59.18% BD-I (40.00%/60.00% manic, 42.1%/57.90% euthymic)<br>47.2%/52.80% HC                                                                           | Cross-sectional study     | MINI-plus                      | sandwich-ELISA | Plasma         | Yes                      | Not specified        | Yes       |
| 4. | Barbosa et al. (2012)   | 25 BD-I euthymic patients<br>25 Healthy controls                                                                       | 50.88±9.11 BD-I<br>48.04±7.08 HC                                                                                                             | 32%/68% BD-I<br>44%/56% HC                                                                                                                                   | Cross-sectional study     | MINI                           | ELISA          | Plasma         | Yes                      | Not specified        | Yes       |
| 5. | Barbosa et al. (2014)   | 46 BD-I patients (23 euthymic, 23 manic)<br>23 Healthy controls                                                        | 49.74±11.41 BD-I (50.39±8.07 euthymic, 49.09±14.76 manic)<br>50.04±6.31 HC                                                                   | 26.09%/73.91% BD-I (17.39%/82.61% euthymic, 34.79%/65.21% manic)<br>21.74%/78.26% HC                                                                         | Cross-sectional study     | MINI-Plus                      | ELISA          | Plasma         | Yes                      | Not specified        | Yes       |
| 6. | Benedetti et al. (2017) | 40 BD-I inpatients current major depressive episode                                                                    | 46.3±13.85 BD-I                                                                                                                              | 32.5%/67.5% BD-I                                                                                                                                             | Cross-sectional study     | Clinical interview             | ELISA          | Serum          | Not specified            | Excluded             | Yes       |
| 7. | Bonnin et al. (2019)    | 102 BD patients (47 psychoeducation [25 BD-I], 39 FR [40 BD-I], 16 TAU [14 BD-I])                                      | 40.95±8.20 BD (35.2±9.2 psychoeducation, 48.5±6.3 FR, 39.5±9.9 TAU)                                                                          | 63.20%/36.79% BD (53.2%/46.8% psychoeducation, 73%/27% FR, 68.7%/31.3% TAU)                                                                                  | Naturalistic cohort study | SCID                           | ELISA          | Serum          | Excluded                 | Excluded             | Yes       |
| 8. | Brietzke et al. (2009)  | 61 BD-I patients (14 euthymic, 23 manic episode, 24 depressive episode)<br>25 Healthy controls                         | 42.23±13.00 BD-I (44.2±13.75 euthymic, 40.8±13.70 manic, 45.0±11.91 depressive)<br>43.4±12.25 HC                                             | 39.33%/60.65% BD-I (28.6%/71.4% euthymic, 47.8%/52.2% manic, 37.5%/62.5% depressive)<br>20.0%/80.0% HC                                                       | Cross-sectional study     | SCID-I                         | CBA            | Serum          | Not specified            | Excluded             | No        |
| 9. | Cetin et al. (2012)     | 45 BD-I patients in euthymic state (22 subsyndromal symptoms, 23 without subsyndromal symptoms)<br>23 Healthy controls | 35.71±7.15 BD-I (36.86±7.03 subsyndromal, 34.61±7.28 without subsyndromal)<br>31.65±5.21 HC                                                  | 44.47%/55.52% BD-I (45.5%/54.5% subsyndromal, 43.5%/56.5% without subsyndromal)<br>47.8%/52.2% HC                                                            | Cross-sectional study     | Clinical interview SKIP-TURK   | ELISA          | Plasma         | Yes                      | Excluded             | Yes       |

|     |                         |                                                                                                                                  |                                                                                       |                                                                                            |                                           |                                                 |                                                                                                        |               |                                                                                                                  |               |                |
|-----|-------------------------|----------------------------------------------------------------------------------------------------------------------------------|---------------------------------------------------------------------------------------|--------------------------------------------------------------------------------------------|-------------------------------------------|-------------------------------------------------|--------------------------------------------------------------------------------------------------------|---------------|------------------------------------------------------------------------------------------------------------------|---------------|----------------|
| 10. | Chang et al. (2017)     | 91 BD patients<br>75 Healthy controls                                                                                            | 43.0±12.2 BD<br>44.03±16.43 HC                                                        | 42.9%/57.1% BD<br>41.3%/58.7% HC                                                           | Cross-sectional study                     | DIGS                                            | ELISA                                                                                                  | Plasma        | Yes                                                                                                              | Excluded      | Yes            |
| 11. | Chiou & Huang (2019)    | 83 BD-I patients (61 mania, 22 depression)<br>222 Healthy controls                                                               | 36.8±11.4 BD-I<br>34.3±7.0 HC                                                         | 45.78%/54.21% BD-I<br>36.03%/63.96% HC                                                     | Cross-sectional study                     | SCID-I                                          | ELISA                                                                                                  | Serum         | Off medication for at least one week                                                                             | Excluded      | Yes            |
| 12. | Dell'Osso et al. (2010) | 33 BD outpatients current major depressive episode (17 unipolar, 16 BD-I)<br>15 Healthy controls                                 | 46.4±14.3 (22-65 years) BD<br>(46.06±10.78 unipolar, 46.75±17.67 BD-I)<br>46.9±9.2 HC | 36.37%/63.63% BD<br>(23.5%/76.5% unipolar, 50%/50% BD-I)<br>20%/80% HC                     | Cross-sectional study                     | MINI                                            | ELISA                                                                                                  | Plasma        | Drug-naïve (n=6), drug-free at least for 2 weeks (n=9) and medicated with different combinations of drugs (n=18) | Excluded      | Not specified  |
| 13. | Dolsen et al. (2018)    | 22 BD-I euthymic patients (11 CBT for insomnia, 11 psychoeducation)                                                              | 36.4±11.85 BD-I                                                                       | 54.5%/45.5% BD-I                                                                           | Post-hoc analysis of a clinical trial     | SCID-I                                          | ELISA                                                                                                  | Saliva        | Yes                                                                                                              | Not specified |                |
| 14. | Du et al. (2017)        | 48 BD patients (typical BD group)<br>63 BD with anxiety disorders patients (atypical BD group)<br>111 Anxiety disorders patients | 33.06±14.53 BD<br>34.33±15.55 atypical BD<br>37.38±12.15 anxiety                      | 31.3%/68.8% BD<br>28.6%/71.4% atypical BD<br>35.1%/64.9% anxiety                           | Retrospective and prospective study       | ICD-10 diagnostic criteria for bipolar disorder | Not specified                                                                                          | Not specified | Yes                                                                                                              | Included      | Not applicable |
| 15. | Grande et al. (2014)    | 115 BD patients (79 BD-I, 18 BD-II, 18 NOS)<br>25 First-degree relatives                                                         | 44.0±20.0 (18-65 years) BD<br>41.0±32.5 First-degree relatives                        | 29.6%/70.4% BD<br>24.0%/76.0% First-degree relatives                                       | Historical cohort study                   | SCID-I                                          | ELISA                                                                                                  | Serum         | Not specified                                                                                                    | Not specified | Yes            |
| 16. | Hope et al. (2015)      | 111 BD patients (65 BD-I, 40 BD-II, 6 NOS)<br>121 SCZ patients<br>241 Healthy controls                                           | 33±10 (18-63 years) BD<br>36±10 SCZ<br>36±12 HC                                       | 54%/46% BD<br>45%/55% SCZ<br>39%/61% HC                                                    | Cross-sectional study                     | SCID-I                                          | EIAs                                                                                                   | Plasma        | Yes                                                                                                              | Included      | Yes            |
| 17. | Isgren et al. (2015)    | 121 BD patients (65 BD-I, 46 BD-II, 10 NOS)<br>71 Healthy controls                                                               | 36.0±22.0 BD<br>32.0±16.0 HC                                                          | 38.8%/61.2% BD<br>36.6%/63.4% HC                                                           | Cross-sectional study                     | ADE                                             | MSD 96-well multi-array and multi-spot human cytokine assay (Human Cytokine Assay Ultra-Sensitive kit) | Serum         | Yes                                                                                                              | Included      | Yes            |
| 18. | Jacoby et al. (2016)    | 60 BD-I patients hospitalized with a manic or mixed episode<br>35 Healthy controls                                               | 42.7±11.7 (20–60 years) BD-I<br>36.7±11.6 (18–59 years) HC                            | 61.7%/38.3% BD-I<br>57.1%/42.9% HC                                                         | Prospective study (6-12 months follow-up) | SCAN<br>ICD-10 diagnosis criteria               | ELISA                                                                                                  | Plasma        | Yes                                                                                                              | Excluded      | Yes            |
| 19. | Karabulut et al. (2019) | 107 BD patients (77 BD chronic [50 euthymic state, 20 manic state, 7 depressive state], 30 BD early-stage)                       | 34.29±10.24 BD (37.81±11.9 BD chronic, 25.27±6 BD early-stage)<br>31.7±11.8 HC        | 52.34%/47.65% BD<br>(57.2%/42.8% BD chronic, 23.4%/76.6% BD early-stage)<br>56.7%/43.3% HC | Cross-sectional study                     | SCID-I                                          | ELISA                                                                                                  | Plasma        | Yes                                                                                                              | Excluded      | Not specified  |

|     |                               |                                                                                                                                    |                                                                                         |                                                                                |                                                                  |                         |                            |        |                                                                                                              |               |               |
|-----|-------------------------------|------------------------------------------------------------------------------------------------------------------------------------|-----------------------------------------------------------------------------------------|--------------------------------------------------------------------------------|------------------------------------------------------------------|-------------------------|----------------------------|--------|--------------------------------------------------------------------------------------------------------------|---------------|---------------|
|     |                               | patients [12 euthymic state, 13 manic state, 2 depressive state, 2 hypomanic state, 1 mixed state])<br>30 Healthy controls         |                                                                                         |                                                                                |                                                                  |                         |                            |        |                                                                                                              |               |               |
| 20. | Kauer-Sant'Anna et al. (2007) | 163 BD-I and BD-II patients (78 with life-time exposure to a traumatic event, 85 without-lifetime exposure to a traumatic event)   | 42.5 ±11.58 BD (42.13±12.00 presence of trauma, 43.01±11.21 absence of trauma)          | 28.18%/71.82% BD (25.0%/75% presence of trauma, 31.1%/68.9% absence of trauma) | Cross-sectional study                                            | SCID-I                  | ELISA                      | Serum  | Yes                                                                                                          | Included      | Yes           |
| 21. | Kenna et al. (2014)           | 47 BD euthymic patients (13 BD-I, 20 BD-II, 14 NOS)<br>26 Healthy controls                                                         | 32.97±6.5 (18-45 years) BD (32.9±6.4 BD-I, 32.1±6.3 BD-II, 34.3±6.9 NOS)<br>31.8±6.4 HC | 0%/100% BD<br>0%/100% HC                                                       | Cross-sectional study                                            | SCID                    | ELISA                      | Plasma | 70% stable pharmacological treatment/30% no treatment                                                        | Excluded      | Yes           |
| 22. | Kim et al. (2013)             | 116 BD-I patients in manic episode, with pharmacological treatment during 6 weeks of follow-up<br>123 Healthy controls             | 35.90±11.76 (35.99±11.67) BD-I<br>35.45±10.37 HC                                        | 36.2%/63.8% (37.3%/62.7%) BD-I<br>45.53%/54.47% HC                             | Longitudinal study (6 weeks)                                     | SCID-I                  | ELISA                      | Plasma | Medicated, drug-naïve and drug-free at baseline; pharmacological treatment during 6 weeks of follow-up       | Not specified | Yes           |
| 23. | Lee et al. (2014)             | 232 BD-II patients in depressed state, with VPA treatment during 12 weeks of follow-up<br>(115 VPA+Memantine, 117 VPA+placebo)     | 31.77±11.56 BD-II                                                                       | 50.86%/49.13% BD-II                                                            | Clinical trial (6-week, double-blind)                            | SADS-L, Chinese version | Antibody pair assay system | Plasma | Medicated at baseline (VPA); low-dose memantine or placebo during 12 weeks of follow-up with randomization   | Excluded      | Yes           |
| 24. | Lee et al. (2016)             | 541 BD patients (117 BD-I, 424 BD-II), with add-on memantine/placebo/dextromethorphan treatment during 12 weeks of follow-up       | 31.2±11.2 BD                                                                            | 48.79%/51.20% BD                                                               | Post-hoc analysis of two clinical trials                         | SADS-L, Chinese Version | ELISA                      | Plasma | Medicated at baseline (VPA); add-on memantine/placebo/dextromethorphan treatment during 12 week of follow-up | Excluded      | Not specified |
| 25. | Loch et al. (2015)            | 23 BD patients in depressive episode (8 BD-I, 15 BD-II), with lithium treatment during 6 weeks of follow-up<br>28 Healthy controls | 28.0 (18-43 years) BD<br>28.3 (17-51 years) HC                                          | 17.4%/82.6% BD<br>46.4%/53.6% HC                                               | Longitudinal study (6 weeks)                                     | SCID                    | ELISA                      | Plasma | Drug-naïve and drug-free at baseline; lithium treatment during 6 weeks of follow-up                          | Excluded      | Yes           |
| 26. | Machado-Vieira et al. (2007)  | 30 BD-I patients in mania state (22 drug-naïve, 8 drug-free)<br>30 Healthy controls                                                | 26±4 (20-40 years) BD-I<br>26.5±5.2 HC                                                  | 23.3%/76.7% BD-I<br>23.3%/76.7% HC                                             | Cross-sectional study                                            | SCID-I                  | ELISA                      | Plasma | Drug-naïve and drug-free                                                                                     | Not specified | Yes           |
| 27. | Maiti et al. (2017)           | 25 BD patients current episode mania, 21 with oxcarbazepine treatment during 4 weeks of follow-up<br>25 Healthy controls           | 34.16±9.89 (18-45 years) BD<br>34.44±9.53 HC                                            | 80%/20% BD<br>80%/20% HC                                                       | Prospective, interventional, open label clinical study (4 weeks) | SCAN                    | ELISA                      | Serum  | Not specified at baseline; oxcarbazepine treatment during 4 weeks of follow-up                               | Excluded      | Not specified |

|      |                                   |                                                                                                            |                                                                                                               |                                                                                                                                      |                                        |                                                                                 |                       |               |                                                                                 |               |               |
|------|-----------------------------------|------------------------------------------------------------------------------------------------------------|---------------------------------------------------------------------------------------------------------------|--------------------------------------------------------------------------------------------------------------------------------------|----------------------------------------|---------------------------------------------------------------------------------|-----------------------|---------------|---------------------------------------------------------------------------------|---------------|---------------|
| 28.  | Mansur et al. (2020)              | 55 BD I-II patients current major depressive episode (27 Infliximab + 28 placebo)                          | BD 44.91 ± 10.90 (44.04 ± 11.55 Infliximab, 45.75 ± 10.28 placebo)                                            | 20%/80% BD (25.9%/74.1% Infliximab, 14.3%/85.7% placebo)                                                                             | Clinical trial (12-week, double-blind) | MINI 5.0.0 for the DSM-IV-TR                                                    | Multiplex assay/ECLIA | Plasma        | Medicated at baseline; pharmacological treatment during 12 weeks of follow-up   | Not specified | Yes           |
| 29.  | Mizuno et al. (2016)              | 60 BD patients<br>60 SCZ patients<br>60 Healthy controls                                                   | 50.2±13.8 (19–75 years) BD<br>45.9±10.0 (25–70 years) SCZ<br>41.0±17.6 (18–77 years) HC                       | 46.7%/53.3% BD<br>36.7%/63.3% SCZ<br>50.0%/50.0% HC                                                                                  | Cross-sectional study                  | MINI                                                                            | ELISA                 | Plasma        | Yes                                                                             | Included      | Yes           |
| 30a. | Mondin et al. (2016)              | 48 BD patients (10 mania/mixed episode, 27 depressive episode, 11 euthymic) 73 MDD 94 Healthy controls     | 21.92 ± 2.32 (18-24 years) BD<br>21.86 ± 2.05 MDD<br>22.40 ± 2.25 HC                                          | 25%/75% BD<br>24.7%/75.3% MDD<br>42.6%/57.4% HC                                                                                      | Cross-sectional study                  | SCID-I MINI                                                                     | ELISA                 | Serum         | Drug-naïve                                                                      | Not specified | Yes           |
| 30b. | Wiener et al. (2017)              | 48 BD patients<br>48 MDD patients<br>48 Healthy controls                                                   | 21.92±2.32 (18-24 years) BD<br>21.81±2.14 MDD<br>21.88±2.31 (18-24 years) HC                                  | 25%/75% BD<br>25%/75% MDD<br>25%/75% HC                                                                                              | Cross-sectional study                  | SCID-I MINI                                                                     | ELISA                 | Serum         | Drug-free                                                                       | Not specified | Not specified |
| 31.  | Monteleone et al. (2008)          | 28 BD euthymic patients (17 BD-I, 11 BD-II)<br>35 UD patients (24 euthymic, 11 MDE)<br>22 Healthy controls | 45.10±11.08 BD (46.6±9.4 BD-I, 42.8±13.7 BD-II)<br>49.2±12.7 UD euthymic,<br>45.7±13.6 UD MDE<br>40.1±16.4 HC | 39.28%/60.70% BD (29.41%/70.58% BD-I, 54.54%/45.45% BD-II)<br>20.83%/79.16% UD euthymic,<br>18.18%/81.81% UD MDE<br>36.36%/63.63% HC | Cross-sectional study                  | SCID-IP, Patient Edition                                                        | ELISA                 | Serum         | Medicated and drug-free                                                         | Not specified | Yes           |
| 32.  | Mora et al. (2019)                | 84 BD patients (52 euthymic, 32 manic)<br>49 Healthy controls                                              | 45.13±12.28 (18-65 years) BD (47.52±11.9 euthymic BD, 41.25±12.9 manic)<br>48.3±12.1 HC                       | 52.38%/47.62% BD (50%/50% euthymic, 56.3%/43.7% manic)<br>42.9%/57.1% HC                                                             | Cross-sectional study                  | SCID-I                                                                          | ELISA                 | Serum         | Yes                                                                             | Excluded      | Yes           |
| 33a. | Munkholm et al. (2014)            | 37 BD rapid cycling patients (22 BD-I, 15 BD-II)<br>40 Healthy controls                                    | 40.9±12.3 (18-70 years) BD<br>36.3±12.5 HC                                                                    | 32.43%/67.56% BD<br>42.5%/57.5% HC                                                                                                   | Longitudinal study                     | SCAN HCl-32                                                                     | ELISA                 | Plasma        | Yes                                                                             | Excluded      | Yes           |
| 33b. | Munkholm et al. (2015)            | 37 BD rapid cycling patients (22 BD-I, 15 BD-II)<br>40 Healthy controls                                    | 40.9±12.3 (18-70 years) BD<br>36.3±12.5 HC                                                                    | 32.43%/67.56% BD<br>42.5%/57.5% HC                                                                                                   | Longitudinal study                     | SCAN HCl-32                                                                     | ELISA                 | Plasma        | Yes                                                                             | Excluded      | Yes           |
| 34.  | Ortiz-Dominguez et al. (2007)     | 20 BD-I patients (10 manic episode, 10 depressive episode)<br>33 Healthy controls                          | 34.3±9.94 (20-50 years) BD-I (28.9±8.45 manic, 39.7±11.43 depressive)<br>32.3±10.8 HC                         | 25%/75% BD-I (30%/70% manic, 20%/80% depressive)<br>15.15%/84.84% HC                                                                 | Cross-sectional study                  | MINI for DSM-IV                                                                 | ELISA                 | Not specified | Drug-naïve and drug-free                                                        | Excluded      | Yes           |
| 35.  | Pantović-Stefanović et al. (2016) | 83 BD-I patients, with pharmacological treatment during 10 weeks of follow-up<br>73 Healthy controls       | 45.61±11.05 BD-I<br>45.82±8.19 HC                                                                             | 36.4%/63.60% BD-I<br>43.2%/56.8% HC                                                                                                  | Longitudinal study (6 weeks)           | SCID-I                                                                          | ELISA                 | Serum         | Unmedicated at baseline; pharmacological treatment during 10 weeks of follow-up | Excluded      | Yes           |
| 36.  | Quidé et al. (2018)               | 69 BD-I patients<br>68 SCZ patients<br>72 Healthy controls                                                 | 38.11±12.31 (18-65 years) BD-I<br>41.78±11.33 SCZ<br>36.17±11.57 HC                                           | 33.33%/66.66% BD-I<br>57.35%/42.64% SCZ<br>52.77%/47.22% HC                                                                          | Cross-sectional study                  | OPCRIT algorithm applied to interviewer ratings on the Diagnostic Interview for | ELISA                 | Serum         | Yes                                                                             | Excluded      | Yes           |

|      |                              |                                                                                                                                                             |                                                                                                           |                                                                                                          |                              | Psychosis<br>criteria        |                       |              |                                                                                                                          |               |     |
|------|------------------------------|-------------------------------------------------------------------------------------------------------------------------------------------------------------|-----------------------------------------------------------------------------------------------------------|----------------------------------------------------------------------------------------------------------|------------------------------|------------------------------|-----------------------|--------------|--------------------------------------------------------------------------------------------------------------------------|---------------|-----|
| 37.  | Reininghaus et al. (2015)    | 101 BD euthymic patients (64 BD-I, 37 BD-II) (35 WCYC, 66 non-WCYC) 48 Healthy controls                                                                     | 44.00±12.99 BD (39.1±11.1 BD WCYC, 46.6±14.0 BD non-WCYC)                                                 | 48.51%/51.48% BD 41.66%/58.33% HC                                                                        | Cross-sectional study        | SCID-I                       | ECLIA                 | Serum        | Yes                                                                                                                      | Not specified | Yes |
| 38.  | Rosa et al. (2006)           | 44 BD-I patients (15 manic, 14 depressed, 15 euthymic) 14 Healthy controls                                                                                  | 40.83±9.29 (30-51 years) BD-I (40.1±9.3 manic, 42.1±8.2 depressed, 40.4±10.3 euthymic) 41.1±11.1 HC       | 41.07%/58.95% BD-I (56.3%/43.8% manic, 28.6%/71.4% depressed, 37.5%/62.5% euthymic) 31.2%/68.8% HC       | Cross-sectional study?       | SCID-I                       | Western blot analysis | Serum        | Yes                                                                                                                      | Not specified | Yes |
| 39a. | Siwek et al. (2016)          | 133 BD patients (65 BD-I and 64 BD-II) (23 manic phase, 61 depressive phase, 49 euthymic) (35 with melancholia, 26 without melancholia) 50 Healthy controls | 44.3±12.9 (21-70 years) BD 45.8±12.4 HC                                                                   | 65.41%/34.58% BD 72%/28% HC                                                                              | Case-control study           | SCID-I                       | ELISA                 | Serum        | Yes                                                                                                                      | Included      | Yes |
| 39b. | Sowa-Kučma et al. (2017)     | 133 BD patients (69 BD-I, 64 BD-II all in depressed or euthymic phase) 114 MDD patients 50 Healthy controls                                                 | 44.3±12.9 BD (42.0 ± 14.6 BD-I, 46.8±10.2 BD-II) 49.4±10.7 MDD 45.8±12.4 HC                               | 65.41%/34.58% BD (42.02%/57.97% BD-I, 26.56%/73.43% BD-II) 35.96%/64.03% MDD 28%/72% HC                  | Case-control study           | SCID-I                       | ELISA                 | Serum        | Not specified                                                                                                            | Excluded      | Yes |
| 40.  | Soares et al. (2016)         | 118 BD patients in euthymic state (91 BD-I, 27 BD-II) 76 Healthy controls                                                                                   | 64.0±9.7 BD (64.2±9.8 BD-I, 63.3±9.5 BD-II) 65.9±9.6 HC                                                   | 31.29%/68.70% BD (30.7%/69.3% BD-I, 33.3%/66.7% BD-II) 48.0%/52.0% HC                                    | Cross-sectional study        | SCID-I                       | ELISA                 | Serum        | Yes                                                                                                                      | Not specified | Yes |
| 41.  | Tatay-Manteiga et al. (2017) | 48 BD euthymic patients (25 early-stage, 23 late-stage) 23 Healthy siblings of BD patients 21 Healthy controls                                              | 44.21±10.06 (18-60 years) BD (43.4±10.3 early-stage, 45.1±9.8 late-stage) 41.5±11.8 siblings 36.7±10.9 HC | 47.91%/52.08% BD (48%/52% early-stage, 47.82%/52.17% late-stage) 30.43%/69.56% siblings 33.33%/66.66% HC | Cross-sectional study        | DSM-IV-TR diagnosis criteria | ELISA                 | Plasma/serum | Yes                                                                                                                      | Included      | Yes |
| 42.  | Tunca et al. (2014)          | 96 BD patients (92 BD-I, 4 BD-II) (37 euthymic, 33 manic, 26 depressed) 61 Healthy controls                                                                 | 38.12±10.84 BD (36.24±10.02 euthymia, 36.77±12.02 mania, 42.54±10.52 depression) 38.29±11.59 HC           | 44.74%/55.25% BD (37.8%/62.2% euthymia, 34.3%/65.7% mania, 67.9%/32.1% depression) 43.3%/56.7% HC        | Cross-sectional study        | SCID-I                       | ELISA                 | Serum        | Medicated and drug-free                                                                                                  | Not specified | Yes |
| 43.  | Uyanik et al. (2015)         | 30 BD-I patients in manic episode, with pharmacological treatment during 6 weeks of follow-up 28 Healthy controls                                           | 33.4±8.6 (18-65 years) BD-I 33.1±7.8 HC                                                                   | 53.3%/46.7% BD-I 60%/40% HC                                                                              | Longitudinal study (6 weeks) | DSM-IV-TR diagnosis criteria | ELISA/EDTA            | Plasma       | Drug free (three groups: 1. never used any treatment; 2. discontinued their treatment for at least 1 month; 3. irregular | Excluded      | Yes |

|      |                              |                                                                                                                                                          |                                                                                                                                   |                                                                                                   |                                                                                     |                           |                            |        |                                                                                                                                                  |               |               |
|------|------------------------------|----------------------------------------------------------------------------------------------------------------------------------------------------------|-----------------------------------------------------------------------------------------------------------------------------------|---------------------------------------------------------------------------------------------------|-------------------------------------------------------------------------------------|---------------------------|----------------------------|--------|--------------------------------------------------------------------------------------------------------------------------------------------------|---------------|---------------|
|      |                              |                                                                                                                                                          |                                                                                                                                   |                                                                                                   |                                                                                     |                           |                            |        | treatment who have not been treated at least one month) at baseline; pharmacological treatment during 6 weeks of follow-up without randomization |               |               |
| 44a. | van den Ameele et al. (2017) | 67 BD patients (35 depressive episode [16 BD-I, 19 BD-II], 32 (hypo)manic episode [26 BD-I, 4 BD-II, 2 schizoaffective])<br>30 Healthy controls          | 43.3±11.1 (23–62 years) BD (43.7±9.7 (28–61 years) depressive, 42.9±12.7 (23–62 years) (hypo)manic)<br>43.0±11.4 (22–61 years) HC | 41.8%/58.2% BD (31.4%/68.6% depressive 53.1%/46.9% (hypo)manic)<br>46.7%/53.3% HC                 | Prospective study                                                                   | MINI-plus, version 5.0.0  | ECLIA                      | Plasma | Yes                                                                                                                                              | Excluded      | Yes           |
| 44b. | van den Ameele et al. (2018) | 67 BD patients (42 BD-I, 23 BD-II, 2 schizoaffective disorder) (29 depressive episode, 29 (hypo)manic episode, 9 mixed episode)<br>35 Healthy controls   | 43.3±11.1 (23–62 years) BD<br>42.7±11.6 (23–62 years) HC                                                                          | 41.8%/58.2% BD<br>45.7%/54.3% HC                                                                  | Cross-sectional study                                                               | MINI-plus                 | ECLIA                      | Plasma | Yes                                                                                                                                              | Excluded      | Yes           |
| 45.  | Wang et al. (2016)           | 48 BD-II patients (placebo)<br>41 SBD (subthreshold bipolar disorder: more than 2-days but less than 4-days duration of hypomania)<br>patients (placebo) | 31.5±11.3 BD-II<br>28.5±10.2 SBD                                                                                                  | 54.16%/45.83% BD-II<br>51.21%/48.78% SBP                                                          | Prospective and longitudinal study (post-hoc subgroup analysis of a clinical trial) | SADS-L, Chinese version   | Antibody pair assay system | Plasma | Yes                                                                                                                                              | Not specified | Yes           |
| 46.  | Wang et al. (2016)           | 737 BD patients (234 BD-I, 260 BD-II, 243 SBD)<br>140 Healthy controls                                                                                   | 32.69±12.20 BD (33.6±11.7 BD-I, 31.6±12.3 BD-II, 33.0±12.6 SBD)<br>31.9±8.17 HC                                                   | 47.48%/52.50% BD (49.14%/50.85% BD-I, 51.92%/48.07% BD-II, 41.15%/58.84% SBD)<br>57.85%/42.14% HC | Cross-sectional study                                                               | SADS-L, Chinese version   | Antibody pair assay system | Plasma | Not specified                                                                                                                                    | Included      | Yes           |
| 47.  | Yoshimura et al. (2006)      | 18 BD-I patients (12 manic episode, 6 depressive episode), with risperidone treatment during 4 weeks of follow-up<br>20 Healthy controls                 | 34±15 (23–51 years) BD-I<br>30±11 HC                                                                                              | 44.44%/55.55% BD-I<br>45%/55% HC                                                                  | Clinical trial (4 weeks)                                                            | DSM-IV diagnosis criteria | ELISA                      | Plasma | Not specified at baseline; risperidone treatment (co-administered valproic acid or lithium) during 4 weeks of follow-up                          | Not specified | Not specified |

**Table S2.** Summary of the number of studies included in the systematic review and meta-analysis, separated by biomarker, mood state and symptoms severity.

[illegible]

**Table S3.** Abbreviations of inflammatory and trophic factors analyzed in the present systematic review and meta-analysis.

| <b>Abbreviation</b> | <b>Name</b>                                  |
|---------------------|----------------------------------------------|
| BDNF                | brain-derived neurotrophic factor            |
| sCD40L              | soluble cluster of differentiation 40 ligand |
| sFlt-1              | soluble fms-like tyrosine kinase 1           |
| GDNF                | glial cell line-derived neurotrophic factor  |
| sICAM-1             | soluble intercellular adhesion molecule-1    |
| IFN- $\gamma$       | interferon-gamma                             |
| IGF-1               | insulin-like growth factor-1                 |
| IL-1 $\beta$        | interleukin 1 beta                           |
| IL-1RA              | interleukin-1 receptor antagonist            |
| sIL-1RA             | soluble interleukin-1 receptor antagonist    |
| IL-2                | interleukin 2                                |
| sIL-2R              | soluble interleukin 2 receptor               |
| IL-4                | interleukin 4                                |
| IL-6                | interleukin 6                                |
| sIL-6R              | soluble interleukin 6 receptor               |
| IL-6RA              | interleukin-6 receptor alpha                 |
| IL-8                | Interleukin 8                                |
| IL-10               | interleukin 10                               |
| IL-18               | Interleukin 18                               |
| IL-18BP             | Interleukin-18 binding protein               |
| NGF                 | nerve growth factor                          |
| $\beta$ -NGF        | beta nerve growth factor                     |
| NT-3                | neurotrophin-3                               |
| NT-4/5              | neurotrophin-4/5                             |
| TGF- $\beta$ 1      | transforming growth factor beta 1            |
| TNF- $\alpha$       | tumor necrosis factor alpha                  |
| sTNFR1              | soluble tumor necrosis factor receptor 1     |
| TNFR2               | tumor necrosis factor receptor 2             |
| sTNFR2              | soluble tumor necrosis factor receptor 2     |
| sTNFR60             | soluble tumor necrosis factor receptor 60    |
| sTNFR80             | soluble tumor necrosis factor receptor 80    |
| sVCAM-1             | soluble vascular cell adhesion molecule-1    |
| VEGF                | vascular endothelial growth factor           |



**Annex S1.** Details of the search strategy conducted in the present systematic review.

The following key word were used for the search: “bipolar\*[Title/Abstract] OR bipolar disorder[Title/Abstract] OR mania\*[Title/Abstract] OR manic[Title/Abstract]” AND “inflam\* factors[Title/Abstract] OR neuroinflam\* factors[Title/Abstract] OR trophic factors[Title/Abstract] OR neurotrophi\* factors[Title/Abstract] OR neurotrophins[Title/Abstract] OR growth factors[Title/Abstract] OR cytokin\*[Title/Abstract] OR oxidative stress[Title/Abstract] OR neurotoxi\*[Title/Abstract] OR neurodevelopment[Title/Abstract] OR neurogenesis[Title/Abstract] OR neuroplasticity[Title/Abstract]” AND “risk factors OR clinic\* factors OR social factors OR psychosocial factors OR environment\* factors OR physical stress\* OR psycholog\* stress\* OR emotional stress\* OR life events OR lifestyle OR epidemiolog\* OR demographic factors OR exposure OR triggers factors OR environmental triggers OR vulnerabilit\* OR stress\* markers OR risks markers OR prenatal factors OR perinatal factors OR maternal exposure OR early adversit\* OR childhood maltreatment OR abuse OR trauma OR substance misuse OR substance abuse OR alcohol\* OR psychiatric comorbidity OR medical comorbidity OR suicid\* OR family history.

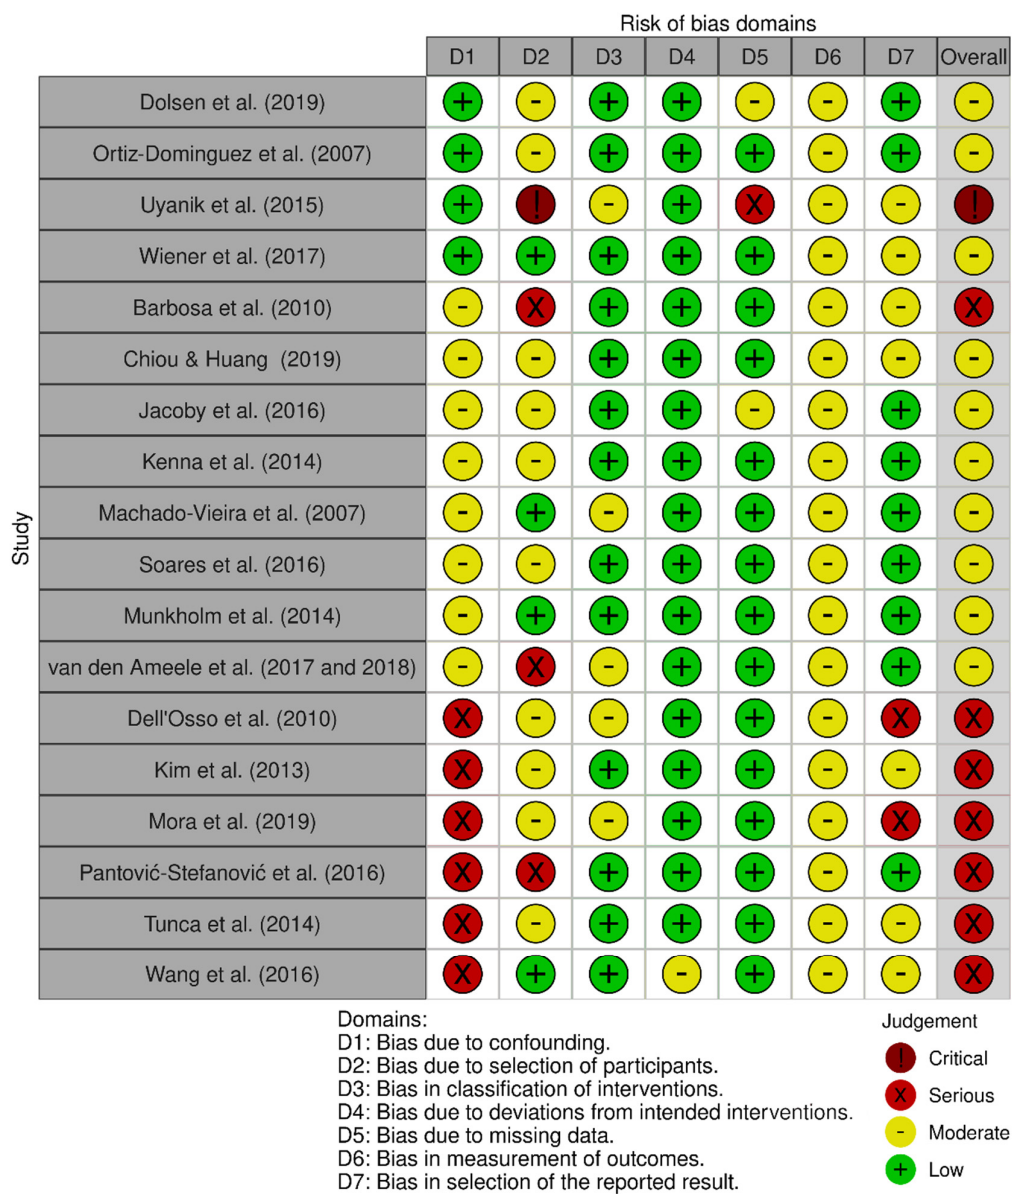

**Figure S1.** Traffic light plot of the domain-level judgments for risk-of-bias assessment.

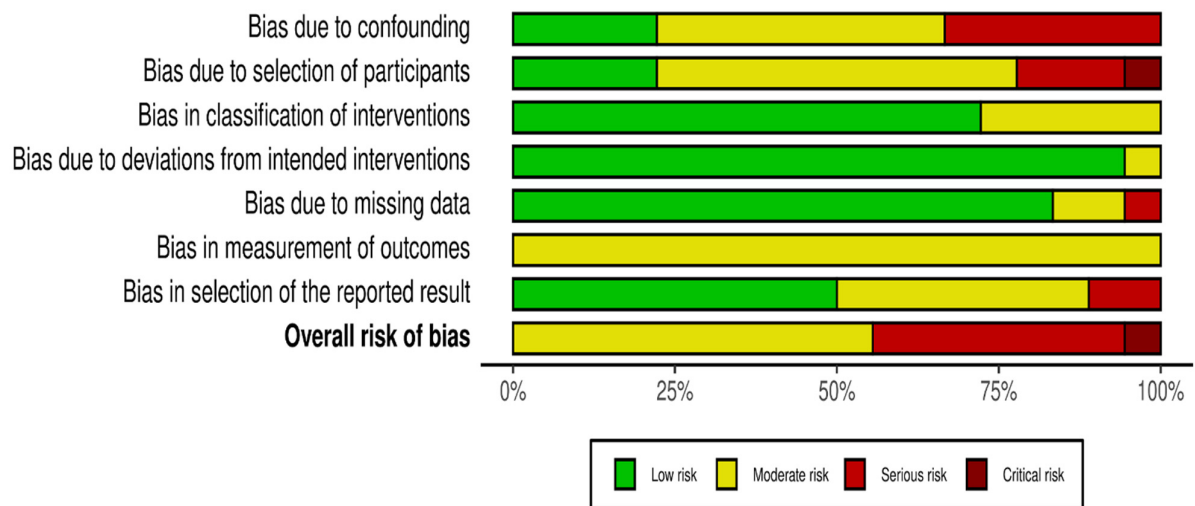

**Figure S2.** Risk-of-bias summary plot.
